1 **The Effects of Sex and Diet on Physiology and Liver Gene Expression in Diversity**  
2 **Outbred Mice**

3

4 Daniel M. Gatti\*, Petr Simecek\*, Lisa Somes\*, Clifton T. Jeffrey\*, Matthew J. Vincent\*,  
5 Kwangbom Choi\*, Xingyao Chen\*, Gary A. Churchill\*, Karen L. Svenson\*

6

7 \* The Jackson Laboratory, Bar Harbor, ME 04609, USA

8

9 Animal Use Summary # 06006

10 Short Read Archive BioProject# PRJNA35625

11

12 Running Title: DO mice on high fat diet

13 Keywords: Diversity Outbred, Nutrigenomics, QTL, Complex Traits

14

15 Karen L. Svenson

16 The Jackson Laboratory

17 600 Main St.

18 Bar Harbor, ME 04609

19 207-288-6342

20 Karen.Svenson@jax.org

21

22  
23  
24  
25  
26  
27  
28  
29  
30  
31  
32  
33  
34  
35  
36  
37  
38  
39  
40  
41  
42  
43  
44

## ABSTRACT

Inter-individual variation in metabolic health and adiposity is driven by many factors. Diet composition and genetic background and the interactions between these two factors affect adiposity and related traits such as circulating cholesterol levels. In this study, we fed 850 Diversity Outbred mice, half females and half males, with either a standard chow diet or a high fat, high sucrose diet beginning at weaning and aged them to 26 weeks. We measured clinical chemistry and body composition at early and late time points during the study, and liver transcription at euthanasia. Males weighed more than females and mice on a high fat diet generally weighed more than those on chow. Many traits showed sex- or diet-specific changes as well as more complex sex by diet interactions. We mapped both the physiological and molecular traits and found that the genetic architecture of the physiological traits is complex, with many single locus associations potentially being driven by more than one polymorphism. For liver transcription, we find that local polymorphisms affect constitutive and sex-specific transcription, but that the response to diet is not affected by local polymorphisms. We identified two loci for circulating cholesterol levels. We performed mediation analysis by mapping the physiological traits, given liver transcript abundance and propose several genes that may be modifiers of the physiological traits. By including both physiological and molecular traits in our analyses, we have created deeper phenotypic profiles to identify additional significant contributors to complex metabolic outcomes such as polygenic obesity. We make the phenotype, liver transcript and genotype data publicly available as a resource for the research community.

45

46

## INTRODUCTION

47

48 Many factors affect the physiology and transcriptional landscape of individuals. Intrinsic  
49 factors, such as sex and genetic background, play a role in shaping individuals. External  
50 factors, such as diet and other environmental stimuli, also play a role in determining the  
51 health and well-being of each person. However, wide variation in individual response to  
52 diet is an enormous challenge to developing prevention and treatment strategies aimed  
53 at reducing the incidence of obesity and metabolic disorders. The response to diet is  
54 affected by both sex (GRIFFIN *et al.* 2016) and individual genetic background (SUHRE  
55 and GIEGER 2012). Disparity in obesity prevalence among sexes has been ascribed to  
56 both biological and sociocultural factors (KANTER and CABALLERO 2012). Sex differences  
57 in fat gain and storage can lead to considerable differences in health outcome among  
58 women and men (POWER and SCHULKIN 2008). Additionally, sex-dependent single  
59 nucleotide variants have been reported that underlie differential contributions to the  
60 development of obesity (KVALOY *et al.* 2013; SALDANA-ALVAREZ *et al.* 2016).

61

62 In human populations, it is difficult to dissect the genetic basis for differential responses  
63 to diet between the sexes due to differences in lifestyle and uncontrolled covariates.  
64 While epidemiological models can estimate correlations between different traits, the  
65 controlled conditions in mouse models allow us to apply randomization and factorial  
66 designs to detect causal associations between obesity and physiological traits. In  
67 mouse models, we can also control the genetic background of the mice, thereby

68 reducing another uncontrolled variable that influences the response to diets between  
69 the sexes. Most mouse models of obesity use a single inbred strain genetically  
70 engineered or experimentally manipulated to become obese (reviewed in (HARIRI and  
71 THIBAUT 2010)). However, genetic background is known to influence the response of  
72 individuals to dietary fat (WANG *et al.* 2002; STOEHR *et al.* 2004; SU *et al.* 2008; LIN *et al.*  
73 2013). In order to generalize our results from mice to humans, it is critical to include  
74 structured genetic diversity in mouse models of dietary response.

75  
76 Multi-parent advanced intercross (MAGIC) populations are powerful models for mapping  
77 genetic modifiers of complex traits due to their high minor allele frequency and fine  
78 mapping resolution (CHURCHILL *et al.* 2004; RAKSHIT *et al.* 2012; RAT GENOME *et al.*  
79 2013; GATTI *et al.* 2014). In MAGIC populations derived from known founders, the  
80 haplotype structure of each sample genome can be reconstructed in terms of the  
81 founder genomes (MOTT *et al.* 2000; GATTI *et al.* 2014). When the founders have been  
82 fully sequenced, the founder sequences can be imputed onto the MAGIC genomes to  
83 allow for whole genome association mapping (YALCIN *et al.* 2005), which improves the  
84 ability to identify candidate genes that influence traits. Transcript profiling in a relevant  
85 tissue adds another important dimension to genetic mapping studies and can be used to  
86 perform mediation analysis on each significant genomic locus (CHICK *et al.* 2016).  
87 There are several mouse MAGIC populations available, including the Northport  
88 Heterogeneous Stock (VALDAR *et al.* 2006), the Collaborative Cross (THREADGILL and  
89 CHURCHILL 2012), the Heterogeneous Stock/Collaborative Cross (IANCU *et al.* 2010) and  
90 the Diversity Outbred (SVENSON *et al.* 2012).

91  
92 In this study, we fed Diversity Outbred mice of both sexes either standard chow or a  
93 high-fat/high-sucrose diet from weaning until approximately 6 months of age. We  
94 measured a variety of physiological traits throughout the study and performed liver  
95 transcriptional profiling at the end of the study. Here, we report on the differential effects  
96 of diet on each sex in terms of physiological and transcriptional trait, provide interactive  
97 viewers for the results and release the entire data set to the public through  
98 supplemental materials and at <http://do.jax.org>.

99

100

## METHODS

101

102 **Mice and husbandry:** Diversity Outbred mice were obtained from The Jackson  
103 Laboratory (Bar Harbor, ME). This study used five independent cohorts of 100-200 non-  
104 sibling DO mice from generations 4 to 11 (G4-G11) for a total of 850 animals, which  
105 builds on an initial study that has previously been reported (SVENSON *et al.* 2012). In  
106 each cohort, half the animals were from first litters in the respective generation and half  
107 were from second litters. An equal number of females and males were included in each  
108 set of animals received. Mice were housed at a density of five same-sex mice per pen in  
109 pressurized, individually ventilated cages (Thoren #11 Duplex II; Thoren Caging  
110 Systems, Hazelton, PA) with pine bedding (Crobb Box, Ellsworth, ME) and free access  
111 to food (diets described below) and acidified water. Light cycle was 12h:12h light:dark,  
112 beginning at 0600. All animal procedures were approved by the Animal Care and Use  
113 Committee at The Jackson Laboratory (Animal Use Summary # 06006).

114

115 **Phenotyping** : Upon receipt, when mice were 3 weeks of age, equal numbers of each  
116 sex were randomly assigned to chow (LabDiet 5K52, LabDiet, Scott Distributing,  
117 Hudson, NH) or high fat, high sucrose feeding (Envigo Teklad TD.08811, Envigo,  
118 Madison, WI) for the duration of the study protocol (26 weeks). Caloric content of the  
119 high fat diet (HFD) was 45% fat, 40% carbohydrates and 15% protein. Tail biopsies  
120 were taken at wean for DNA preparation. Weight was monitored weekly throughout the  
121 study. At age 8 weeks mice began a pipeline of noninvasive phenotyping assays to  
122 profile metabolic health (Table 1). Some modifications to the pipeline were made as the  
123 number of cohorts progressed, such that all parameters were not measured in all mice.  
124 Table 1 lists each phenotypic measurement and the number of mice tested. Data was  
125 obtained from 846 mice and 154 traits were used for analysis. Clinical chemistries,  
126 urinalysis and body composition assessments were performed at two time points in the  
127 study to evaluate stability of traits under prolonged HFD. Hence, calculated traits  
128 comparing first and second measures were generated as derived traits. Details about  
129 blood collection and analysis and body composition by dual-energy x-ray  
130 absorptiometry (DEXA) have been described previously for this pipeline (Svenson 2012  
131 Genetics). Additional tests include body composition by qNMR (EchoMRI),  
132 electrocardiogram, intraperitoneal glucose tolerance test (ipGTT), and evaluation of  
133 chemokines by electrochemiluminescence. To quantitate lean and fat tissue and free  
134 and total water, EchoMRI (EchoMRI, Houston, TX) without anesthesia was used,  
135 providing three time points for evaluation of tissue composition during the study and  
136 minimizing the need for anesthesia during the pipeline. Electrocardiography was

137 performed using the ECGenie™ (Mouse Specifics, Quincy, MA) system, whereby  
138 unanesthetized mice are placed on a platform raised 18” above the laboratory bench  
139 containing a lead plate. When animals contact the plate with any three paws the trace  
140 begins. Fast Fourier analysis (AnonyMouse™ software v2.2; Mouse Specifics) defines  
141 interval durations from which heart rate, variability and other features of cardiac  
142 conduction can be assessed. To evaluate glucose clearance, mice were fasted  
143 overnight (15 hours) and in the morning mice were weighed and a small blood sample  
144 from a tail tip incision was used in the Abbott glucometer system to measure fasted  
145 glucose (GTT time 0; t0). A glucose solution was then injected intraperitoneally at 2 mg  
146 glucose/gram body weight and tail tip blood samples were obtained at 15, 30, 60, 120  
147 and 180 minutes after injection. Plasma leptin, insulin, ghrelin and adiponectin were  
148 measured from nonfasted mice using the Meso Scale Discovery™  
149 electrochemiluminescent assay detection system according to the manufacturer’s  
150 protocols. We transformed all traits to ranked Z-scores before performing statistical  
151 analyses.

152

153 **Genotyping and Diplotype Reconstruction:** DNA was prepared from tail biopsies and  
154 genotyped using two versions of the Mouse Universal Genotyping Array (MUGA)  
155 (MORGAN *et al.* 2016). We genotyped 531 samples on the MUGA and 293 samples on  
156 the Megamuga (GeneSeek, Lincoln, NE). We used the intensities from each array to  
157 infer the haplotype blocks in each DO genome using a hidden Markov model (HMM)  
158 (GATTI *et al.* 2014).

159



160 **Genotyping by RNA-sequence:** Genotyping by RNA-sequence (GBRS) is a set of  
161 software tools that reconstruct individual genomes of each sample in multi-parent  
162 population (MPP) models by decoding known polymorphisms of founder strains from  
163 RNA-Seq data without resorting to genotyping arrays. The new method is efficient since  
164 it avoids maintaining hundreds of individualized genome indexes by aligning RNA-Seq  
165 reads to a common pooled transcriptome of all founder strains a single time. Since our  
166 reusable model parameters can be easily estimated from separate RNA-Seq data of  
167 inbred founder strains or from simulations, we can quickly process each MPP sample  
168 independently. The software package implements our alignment strategy and statistical  
169 models and is freely available at <https://github.com/churchill-lab/gbrs>. We used the  
170 GBRS haplotype reconstructions to fill in samples that failed to genotype due to low call  
171 rates on the MUGA or Megamuga.

172

173 **Merging Haplotype Reconstructions from Different Methods:** The MUGA and  
174 Megamuga have different numbers of markers (MUGA: 7,854, Megamuga: 77,642) and  
175 the HMM produced diplotype probabilities only at each marker. In contrast, the GBRS  
176 method produced diplotype probabilities at each gene that was expressed in the liver.  
177 In order to merge diplotype probabilities from the data, we interpolated both markers  
178 grids to an evenly spaced 64,000 marker grid (0.0238 cM between markers). After  
179 merging the diplotype reconstructions, we had a total of 835 samples.

180

181 **Principal Component Analysis of Physiological Traits and Liver Transcription:** We  
182 retained 129 out of 160 physiological traits with < 50% missing data across samples.

183 The 24 traits with > 50% missing data were ACR1, ACR2, Adiponectin, BW.3, BW.27,  
184 BW.28, BW.29, BW.30, fat.g.mri, free.h20, FRUC1, Ghrelin, GTT.AUC, GTT.t0,  
185 GTT.t15, GTT.t30, GTT.t60, GTT.120, GTT.180, Lipase1, non.fast.Calcium, TBIL1,  
186 TBIL2 and tot.h20 (see File S1 for abbreviations). We used the Probabilistic PCA  
187 method of the `pcaMethods` software (STACKLIES *et al.* 2007) to impute missing data in  
188 the remaining traits and calculated the first 10 principal components.

189

190 **Physiological Traits Correlations:** We regressed out the outbreeding generation, sex  
191 and diet effects from each of the physiological traits and calculated the pairwise  
192 Pearson correlation between all physiological traits.

193

194 **Alignment, Quantification and Normalization of Liver Transcription Data:** We  
195 aligned reads from the DO liver data to pooled transcriptomes derived from the eight  
196 DO founder strains by incorporating strain-specific SNPs, insertions and deletions into  
197 the reference genome sequence. We quantified expected read counts using an  
198 expectation maximization algorithm (EMASE, <https://github.com/churchill-lab/emase>)  
199 (CHICK *et al.* 2016). We retained 12,067 genes with mean transcripts per million across  
200 all samples greater than one. We normalized effective counts to the upper quartile value  
201 and transformed them to rank normal scores.

202

203 **Differential Expression and Gene Set Enrichment Analysis of Liver Transcript**  
204 **Data:**

205 We performed analysis of variance (ANOVA) on the normalized liver transcription data  
206 to identify genes that were differentially expressed between sexes, diets or that had a  
207 sex by diet interaction. We regressed the expression of each gene on generation and  
208 litter, sex, diet and the sex by diet interaction. We adjusted the p-values using the  
209 Benjamini & Hochberg false discovery rate (FDR)(BENJAMINI and HOCHBERG 1995).

210

211 We searched for Gene Ontology (GO) categories (ASHBURNER *et al.* 2000) that were  
212 differentially expressed between sexes, diets or that had a sex by diet interaction using  
213 the SAFE software package (BARRY *et al.* 2005). We used the “t.Student” local statistic  
214 to test for differential expression for each gene and the “Wilcoxon” global statistic to test  
215 for differential enrichment between categories. For sex effects, we regressed diet from  
216 each gene and then tested for the effect of sex. For diet effects, we regressed sex from  
217 each gene and then tested for the effect of diet. For the sex by diet interaction, we  
218 compared the reduced model with sex and diet to the full model containing sex, diet and  
219 the sex by diet interaction. We determined the empirical p-value for each category using  
220 10,000 permutations and retained GO categories with p-values  $\leq 0.05$ .

221

222 **Linkage Mapping:** At each marker, we regressed each phenotype on generation, sex,  
223 diet and the diplotype probabilities for each mouse and included an adjustment for  
224 correlation between residuals due to kinship. We used the same model for liver  
225 expression QTL mapping. We performed 5,000 permutations of a rankZ transformed  
226 phenotype and selected significance thresholds from the empirical distribution of  
227 maximum LOD scores. We estimated the founder allele effects using a Best Linear

228 Unbiased Predictor (BLUP) in which we fit a mixed-effects model at each marker that  
229 shrinks the founder effects in proportion to the magnitude of the standard errors. We  
230 used the *qtl2* R package available at: <https://github.com/rqtl>. Full details of the linkage  
231 mapping model are in (GATTI *et al.* 2014).

232

233 **Association Mapping:** We imputed the DO founder SNPs from the Sanger Mouse  
234 Genomes Project (REL-1505) onto each founder haplotype block in the DO genomes.  
235 We then regressed each phenotype on generation, sex, diet and the SNP probabilities  
236 for each mouse and included an adjustment for correlation between residuals due to  
237 kinship. Full details of the association mapping model are in (GATTI *et al.* 2014).

238

239 **Mediation Analysis:** For each physiological QTL peak with a genome-wide adjusted p-  
240 value above 0.05, we performed mediation analysis to identify candidate liver genes  
241 that might be responsible for the peak (CHICK *et al.* 2016). We fit a null model by  
242 regressing the phenotype on generation, sex, diet and the diplotype probabilities at the  
243 markers with the maximum LOD score. We added the expression of each of the 12,067  
244 genes to the model and recorded the drop in the LOD score compared to the null  
245 model. We estimated the standard deviation of the LOD drops and report genes that  
246 decreased the LOD score by more than 6 standard deviations. We refer to these  
247 standardized LOD score drops as “Z-scores”. We used the *intermediate* R package  
248 available at <https://github.com/simecek/intermediate> .

249

250 **Data and Reagent Availability:** J:DO mice are available for purchase from The  
251 Jackson Laboratory (Strain # 009376) at <https://www.jax.org/strain/009376>. The liver  
252 gene expression data is archived at the Short Read Archive under project number  
253 PRJNA35625. The physiological phenotypes are described in File S1, the raw  
254 phenotypes are in File S2 and the normalized phenotypes are in File S3. The genotype  
255 data for all mice and the R data objects used in all analyses are available at  
256 <http://do.jax.org>. We used the Sanger REL-1505 SNPs and structural variants (KEANE *et*  
257 *al.* 2011) and the Ensembl build 82 transcripts (YATES *et al.* 2016).

258

259

## RESULTS

260

### 261 **Impact of Sex and Diet on Physiological Traits and Liver Transcription**

262

263 We maintained mice of both sexes on either a chow diet (n = 449) or a high fat diet (n =  
264 397) from wean to at least 26 weeks. We measured a range of physiological traits  
265 throughout the study and measured several traits at two time points (File S1). We  
266 calculated the principal components of the physiological traits and found that the mice  
267 grouped by sex and diet (Figure 1A). Principal component (PC) 1 accounted for 29.2%  
268 of the variance and is correlated with sex. PC2 accounts for 7.6% of the variance and is  
269 correlated with diet. We also quantified liver transcription at 26 weeks in a subset of 478  
270 mice. When we calculated the PCs for a subset of 12,067 genes, we found that the  
271 samples also clustered by sex and diet (Figure 1B). PC1 and 2 accounted for 12.1%  
272 and 10.9% of the variance, respectively. Mice on the chow diet formed tighter clusters  
273 than mice on the high fat diet, reflecting larger variance in liver gene expression in mice  
274 on the high fat diet.

275

276 **Correlation between Physiological Traits:** We calculated the pairwise Pearson  
277 correlation of all traits after regressing out sex and diet and identified several clusters of  
278 correlated traits (File S4). Most traits measured at two time points clustered near each  
279 other, indicating that genetic background affects many traits throughout the mouse's  
280 lifespan. Body weight (BW) at all time points was positively correlated with other BW as  
281 well as adiponectin, insulin, bone mineral density (BMD) and lean and fat tissue mass.

282 Cholesterol (CHOL) at 19 weeks was highly correlated with high-density lipoprotein  
283 (HDL,  $\rho = 0.95$ ,  $p < 10^{-16}$ ), as expected for mice, triglycerides (TG,  $\rho = 0.40$ ,  $p < 10^{-16}$ ),  
284 glucose ( $\rho = 0.28$ ,  $p = 1.7 \times 10^{-16}$ ), non-esterified fatty acids (NEFA,  $\rho = 0.44$ ,  $p < 10^{-16}$ ),  
285 body weight ( $\rho = 0.20$ ,  $p < 6.6 \times 10^{-9}$ ) and circulating calcium (Ca,  $r = 0.50$ ,  $p < 10^{-16}$ ).  
286 These correlations are in agreement with recent evidence that circulating calcium levels  
287 are associated with worsening lipid profiles in humans (GALLO *et al.* 2016) and that  
288 coronary artery calcification is an independent risk factor for atherosclerosis and  
289 cardiovascular disease (BUDOFF *et al.* 2007). The area under the curve of the glucose  
290 tolerance test at 24 weeks (GTT) was positively correlated with BW at 24 weeks ( $\rho =$   
291  $0.29$ ,  $p = 4.70 \times 10^{-5}$ ) and other time points, GLUC at 19 weeks ( $\rho = 0.30$ ,  $p = 1.87 \times 10^{-$   
292  $6$ ), leptin at 8 weeks ( $\rho = 0.21$ ,  $p = 2.62 \times 10^{-3}$ ), indicating a connection between appetite  
293 and circulating glucose levels. Leptin ( $\rho = 0.80$ ,  $p < 10^{-16}$ ), insulin ( $\rho = 0.42$ ,  $p < 10^{-16}$ ),  
294 adiponectin ( $\rho = 0.40$ ,  $p < 10^{-16}$ ) and % fat at both time points were positively correlated,  
295 indicating a connection between appetite and adiposity. Glutamate dehydrogenase  
296 (GLDH) at 19 weeks was positively correlated with and BW traits at ages over 15 weeks  
297 ( $\rho = 0.212$ ,  $p = 2.45 \times 10^{-9}$ ). While this observation may suggest that liver injury is  
298 associated with increased weight, it is not correlated with increased fat tissue mass as  
299 might be expected. It is likely that this correlation is an effect of aging and may be driven  
300 by those animals that were fed HFD. The correlations are available as an interactive on-  
301 line tool at: <http://churchill-lab.jax.org/www/Svenson850/corr.html>.

302

303 **Impact of Sex and Diet on Physiological Traits:** We tested each trait for the effect of  
304 sex, diet and a sex by diet interaction in order to identify the effects of each on the

305 physiological traits (File S5). This analysis stratified our results into four effect classes,  
306 each demonstrated by examples in Figure 2. There were 12 traits for which no  
307 difference was found between sexes or diet groups, including eosinophil counts (EOS)  
308 and spleen weight (Figure 2A). Sex had an effect on 130 traits at a false discovery rate  
309 (FDR)  $\leq 0.05$  (Figure 2B). Males had higher mean values for 101 of these traits,  
310 including body weight, monocyte counts (MONO), neutrophil counts (NEUT), glucose  
311 tolerance test (GTT.AUC), heart rate (HR), mean corpuscular volume (MCV), mean  
312 platelet volume (MPV), phosphorous, platelet counts (PLT), red blood cell distribution  
313 width (RDW) and cholesterol (CHOL). Females had higher mean values for 29 traits,  
314 including mean corpuscular hemoglobin concentration (CHCM), hemoglobin (HGB),  
315 ghrelin, %Fat and red blood cell counts (RBC).

316  
317 Diet had an effect on 116 traits at an FDR  $\leq 0.05$ . Mice on the HFD had higher mean  
318 traits values for adiponectin, weight and fat traits, %Fat, GTT.AUC, HGB, insulin, leptin,  
319 total bilirubin (TBIL), glutamate dehydrogenase (GLDH) and CHOL. Mice on the chow  
320 diet had higher blood urea nitrogen (BUN), kidney weight, MONO, NEUT, PLT,  
321 triglycerides (TG) and urine creatinine and glucose.

322  
323 CHOL was higher in males as compared to females at both time points and on both  
324 diets (File S5). At eight weeks, males on the chow diet (94.1 mg/dL) had CHOL levels  
325 20% higher than females (78.4 mg/dL). At 19 weeks, CHOL levels on the chow diet  
326 were similar to levels at eight weeks in males (94.2 mg/dL) and females (75.8 mg/dL).  
327 The HFD increased CHOL levels at both time points. At eight weeks, males on the HFD



328 (126 mg/dL) had CHOL levels that were 20% higher than females (105 mg/dL). At 19  
329 weeks, males (128 mg/dL) had CHOL levels that were 16.3% higher than females (110  
330 mg/dL) (Figure 2C). At 19 weeks, the HFD increased CHOL by 45.1% compared to the  
331 chow diet in females and by 35.9% in males. CHOL levels did not change greatly  
332 between eight and 19 weeks. Female CHOL levels on the HFD increased by 4.7% from  
333 105 mg/dL to 110 mg/dL and males increased by 1.6% from 126 mg/dL to 128 mg/dL.  
334 Therefore, the increase in CHOL levels compared to chow values was established by  
335 eight weeks in the HFD group and increased only minimally by the second time point.

336

337 There were 14 traits for which sex and diet showed a significant interaction ( $FDR \leq$   
338 0.05, Figure 2D). BMD2 had one of the strongest sex by diet interactions, with mice on  
339 the chow diet having similar BMD between the sexes, but males having higher BMD  
340 than females on the HFD. This may be due to males gaining more weight and needing  
341 stronger bones to carry the weight. This is consistent with higher BW in males and the  
342 correlation of BW to BMD, such that male weight gain may require bone fortification to  
343 support increased body mass.

344

345 **Impact of Sex and Diet on Liver Transcription:** We tested each of the 12,067  
346 transcripts for the effects of sex, diet and a sex by diet interaction (File S6). We found  
347 7,723 genes with sex effects ( $FDR \leq 0.01$ ) and 5,299 genes with significant diet effects  
348 ( $FDR \leq 0.01$ ). We found 757 genes with a significant sex by diet interaction. In order to  
349 interpret the functional relevance of these large gene lists, we searched for Gene  
350 Ontology (GO) categories that were enriched in for each effect. We identified 212 GO

351 Biological Process (GO.BP) categories out of 2,570 in which genes were differentially  
352 expressed between the sexes ( $p \leq 0.05$ , File S7). Of those traits affected by sex, organ  
353 regeneration (GO:00031100) was the most significant category and was higher in  
354 males. This was followed by lipid metabolism (GO:0006629) and transport  
355 (GO:0006869), which was higher in males. However, cholesterol metabolism  
356 (GO:0008203, GO:0006695) was lower in males. Fatty acid metabolism (GO:0000038 &  
357 GO:0070542) and beta-oxidation were higher in male mice along with catabolism of  
358 triglycerides (GO:0019433). Of note, male mice had higher expression of genes  
359 involved in unfolded protein responses (GO:1900103, GO:0072321), extracellular matrix  
360 disassembly (GO:0022617), and fibroblast proliferation (GO:0048146). This suggests  
361 that males experienced greater stress from unfolded protein responses, cellular  
362 remodeling and proliferation.

363

364 We identified 212 GO.BP categories that contained genes that were differentially  
365 expressed by diet ( $p \leq 0.05$ , Supplemental File S11). For these, heat generation  
366 (GO:0031649) and energy reserve metabolism (GO:0006112) were upregulated in mice  
367 on HFD. Lipid metabolism (GO:0045834) was upregulated while lipid biosynthesis  
368 (GO:0051055), including fatty acids (GO:0006633, GO:0042761) and phospholipids  
369 (GO:0008654, GO:0015914) was down-regulated in mice fed the HFD. Lipid storage  
370 (GO:0010888), cholesterol transport (GO:0030301) and gluconeogenesis  
371 (GO:0045721) were all decreased in mice fed the HFD. Insulin secretion in response to  
372 glucose stimulation was suppressed (GO:0061179) and glucose metabolism was  
373 increased (GO:0010907). Overall, the HFD produced increases in lipid and energy

374 metabolism while decreasing lipid biosynthesis and storage, and perturbed glucose  
375 homeostasis.

376

### 377 **Physiological Trait Mapping**

378

379 We mapped the physiological traits using each of three models: a model in which sex  
380 and diet were additive covariates (additive model); one in which sex and diet were  
381 additive covariates and sex interacted with genotype (sex-interactive model) and one in  
382 which sex and diet were additive covariates and diet interacted with genotype (diet-  
383 interactive model).

384

385 **Additive Model:** We identified 82 additive QTL with genome-wide p-values  $\leq 0.05$  (File  
386 S9). Of these, 39 were hematology traits, 23 were body weight or body composition  
387 traits, 14 were clinical chemistry traits, 3 were electrocardiogram traits and 3 were  
388 urinalysis traits.

389

390 Circulating cholesterol at 8 and 19 weeks (CHOL1 & CHOL2) had additive QTL on  
391 chromosome 1 at 171.37 Mb with a LOD of 13.92 for CHOL1 and 13.57 for CHOL2  
392 (Figure 3A). The pattern of founder allele effects at this locus was similar at both time  
393 points (Figure 3B). The 129S1/SvImJ (129S1) and WSB/EiJ (WSB) alleles on the distal  
394 end of chromosome 1 were associated with higher cholesterol levels. We performed  
395 association mapping around the peak at 171.37 Mb and found that the most significant

396 SNPs (rs587286870 & rs580179709) had founder allele patterns for which the 129S1  
397 and WSB strains carried the minor allele (Figure 3C). When we fit the association  
398 mapping model again by including these SNPs as covariates, the maximum LOD score  
399 in the region between 170 and 175 Mb decreased to 1.72, which is well below the  
400 significance threshold. Both rs587286870 and rs580179709 are in an intron of *prefoldin*  
401 *2* (*Pfdn2*), which is part of a molecular chaperone complex that stabilizes unfolded  
402 proteins. It is unclear how *Pfdn2* might impact circulating cholesterol levels. However,  
403 we note that both of these SNPs are near a gene that is known to influence cholesterol  
404 levels, apolipoprotein A-II (*Apoa2*) located at 171.2 Mb. The 129S1 strain carries a  
405 private alanine to valine substitution (rs8258226) that increases cholesterol levels  
406 (WANG *et al.* 2004). The WSB strain carries a non-synonymous SNP (rs229811374)  
407 that changes a serine to an asparagine and is located six nucleotides upstream of  
408 rs8258226. If both of these SNPs increase cholesterol levels, this may explain the  
409 increase in the 129S1 and WSB alleles effects at the *Apoa2* locus (Figure 3D) and the  
410 strong association with all SNPs where the minor allele occurs in both 129S1 and WSB.  
411 The peak in this region is broad and may include more than one locus and allele. When  
412 we regressed out the effects of the 129S1 and WSB alleles at the *Apoa2* locus, the  
413 maximum LOD of 5.35 occurred at 138.178 Mb on chromosome 1. We searched for  
414 other genes expressed in the liver that might influence cholesterol levels by mediating  
415 the peak with the expression of each gene (see Methods). We found six genes that  
416 reduced the LOD score by greater than six standard deviations (i.e. had a Z-score < -6,  
417 Figure 3E); inhibitor of kappaB kinase epsilon (*Ikbke*), peptidase M20 domain containing  
418 1 (*Pm20d1*), adenosine A1 receptor (*Adora1*), coagulation factor XIII, beta (*F13b*),

419 complement factor H-related 1 (*Cfhr1*) and cathepsin E (*Ctse*). Of these, *Cfhr1* had a Z-  
420 score of -18.6, which was lower than any other gene. The next lowest Z-score was -13  
421 for *Ctse*. We tested whether *Ctse* would still reduce the LOD score by performing  
422 mediation analysis with *Cfhr1* in the model and found that *Ctse* still had a Z-score of -  
423 9.6. We found that *F13b* had a Z-score of -6.7 in this scan as well. The founder allele  
424 effects for *Cfhr1* (Figure 3F) show that mice carrying the PWK/PhJ (PWK) allele have  
425 higher *Cfhr1* levels and mice carrying the A/J allele have lower levels. For *Ctse*, the  
426 129S1, WSB and NZO/HILtJ (NZO) strains have higher *Ctse* expression (Figure 3G).  
427 For *F13b*, the WSB allele is associated with lower *F13b* expression (Figure 3H). *Cfhr1*  
428 is upregulated in the mouse retina in response to a different high fat diet (ZHENG *et al.*  
429 2015). *Ctse* deficient mice fed a high fat diet showed hypercholesterolemia, reduced  
430 body weight gain and impaired fat development compared to controls mice (KADOWAKI  
431 *et al.* 2014). *F13b* is part of the coagulation cascade and has not been previously  
432 associated with cholesterol metabolism.

433

434 We found a peak for CHOL2 on chromosome 5 at 123.760 Mb for which the NZO allele  
435 was associated with higher cholesterol levels (Figure 4A). When we mediated the QTL  
436 peak at 123.76 Mb with the liver expression of each gene on chromosome 5, we found  
437 that TRAF-type zinc finger domain containing 1 (*Trafd1*) and scavenger receptor class  
438 B1 (*Scarb1*) reduce the LOD score by more than six standard deviations (Figure 4B).  
439 *Trafd1* is associated with the regulation of innate immune responses and is not known  
440 to have a function in cholesterol metabolism or transport. However, the pattern of allele  
441 effects (Figure 4C) and the mediation score suggest that it may play an unknown role.

442 We repeated the mediation scan using *Trafd1* expression as a covariate and found that  
443 *Scarb1* was the only gene that reduced the LOD score by more than 6 standard  
444 deviations. DO mice carrying the NZO allele at the QTL had lower transcript levels of  
445 *Scarb1* (Figure 4D), which is consistent with the founder allele effects for CHOL2.  
446 *Scarb1* is the primary receptor for HDL-cholesterol uptake by the liver and steroidogenic  
447 tissues and is vital for reverse cholesterol transport. Targeted mutations in *Scarb1* lead  
448 to abnormal lipoprotein metabolism and increased cholesterol levels (MOHR *et al.* 2004).  
449 Liver-specific reduction in *Scarb1* expression as a result of an ENU-induced point  
450 mutation has also been reported, in which mice exhibit 70% higher plasma HDL-  
451 cholesterol levels due to reduced HDL selective uptake (STYLIANOU *et al.* 2009). *Scarb1*  
452 was proposed as a candidate gene for hypercholesterolemia in an intercross between  
453 NZB/B1NJ and SM/J (PITMAN *et al.* 2002), but the authors found no sequence, mRNA or  
454 protein differences. However, whole-genome sequencing of NZO has revealed a stop  
455 gain mutation (rs233349576, Figure 4E & F) at residue 37 in ENSMUST00000137783.  
456 This may produce an incomplete protein and may alter its function.

457

458 **QTL that Interact with Diet:** There were 12 QTL with p-values  $\leq 0.05$  for which  
459 genotype interacted with diet (File S9), including 6 clinical chemistry traits, heart rate,  
460 lymphocyte counts, urinary creatinine, body weight and body length. Cholesterol at 8  
461 weeks (CHOL1) had a QTL that interacted with diet on chromosome 10 at 21.99 Mb  
462 with a LOD of 10.6 ( $p \leq 0.001$ , Figure 5A). Mice carrying the NOD allele on the HFD had  
463 higher cholesterol levels. We mediated the QTL peak with all liver transcripts and found  
464 that *E030030I06Rik* decreased the LOD by more than six standard deviations.

465 *E030030I06Rik* has a local eQTL on chromosome 10 at the same location. Association  
466 mapping near the QTL peak produced significant associations with one gene,  
467 *Gm20125*, which is a gene model with no known function.

468

469 Heart rate at 13 weeks (HR) had a QTL that interacted with diet on chromosome 6 at  
470 125.63 MB with a LOD of 10.4 ( $p \leq 0.001$ , Figure 5B). Mice carrying the A/J or  
471 C57BL/6J allele on the HFD had higher HR than mice carrying the CAST allele. We did  
472 not perform mediation analysis because we do not have heart transcript information on  
473 these mice. Association mapping near the peak produced two SNPs (rs48596855,  
474 rs38346309) in the introns of anoctamin 2 (*Ano2*), a calcium activated chloride channel,  
475 a class of genes that may play a role in cardiac function (GUO *et al.* 2008; HARTZELL *et*  
476 *al.* 2009). Another gene, potassium voltage-gated channel, shaker-related 1, (*Kcna1*), is  
477 located 1 Mb distal from the peak SNPs and has been associated with changes in heart  
478 rate (GLASSCOCK *et al.* 2010).

479

480 Glutamate dehydrogenase, a marker of liver injury, at 19 weeks (GLDH2) had a QTL  
481 that interacted with diet on chromosome 9 at 92.19 Mb with a LOD of 11.86 ( $p \leq 0.001$ ,  
482 Figure 5C). Mice carrying the A/J, NZO or PWK alleles on the HFD had higher GLDH  
483 levels. There were no genes that had mediation Z-scores less than -6 near the QTL  
484 peak. When we performed association mapping near the peak, we found four  
485 transcripts with intronic SNPs and LOD scores over 7; *Gm29478*, *1700057G04Rik*,  
486 phospholipid scramblase 4 (*Plscr4*), and procollagen lysine, 2-oxoglutarate 5-

487 dioxygenase 2 (*Plod2*). Both *Plscr4* and *Plod2* had local eQTL on chromosome 9.  
488 *Plscr4* is a membrane protein that is involved in the organization of phospholipids and  
489 interacts with the CD4 receptor of T lymphocytes (PY *et al.* 2009). It is up-regulated with  
490 HFD feeding (SONG *et al.* 2012). *Plod2* hydroxylates lysine residues and is involved in  
491 remodeling of the extracellular matrix (GILKES *et al.* 2013) and fibrosis (VAN DER SLOT *et*  
492 *al.* 2003). Under hypoxic conditions, *Plod2* is expressed in hepatocellular carcinoma  
493 and is correlated with tumor size and macroscopic intrahepatic metastasis. It is a  
494 prognostic factor for disease-free survival (NODA *et al.* 2012).

495

496 **QTL that Interact with Sex:** There were 9 QTL with p-values  $\leq 0.05$  for which genotype  
497 interacted with sex (File S9), including 5 clinical chemistry traits and 4 hematology traits.  
498 Blood urea nitrogen at 19 weeks (BUN2) had a QTL that interacted with sex on  
499 chromosome 10 at 95.85 Mb with a LOD of 11.7 ( $p \leq 0.001$ ). Males carrying the 129S1,  
500 C57BL/6J and WSB alleles were associated with higher BUN and females carrying the  
501 PWK allele with lower BUN. We did not perform mediation analysis because we do not  
502 have kidney transcript information on these mice. Total bilirubin at 19 weeks (TBIL2)  
503 had a QTL that interacted with sex on chromosome 19 at 14.89 Mb with a LOD of 11.1  
504 ( $p \leq 0.001$ , Figure 5D). Females carrying the NZO allele had higher bilirubin and males  
505 carrying the CAST allele had lower bilirubin. Mediation analysis using liver gene  
506 expression did not reveal a candidate gene. The most significant SNPs in the  
507 association mapping on chromosome 19 were near five transcripts: Gm8630,  
508 Gm31441, Gm37997, Gm26026 and transducin-like enhancer of split 4 (*Tle4*). None of  
509 the gene models had a QTL. *Tle4* is a transcriptional corepressor factor that regulates



510 mouse hematopoiesis and bone development (WHEAT *et al.* 2014), and has also been  
511 used for histological application as a podocyte nuclear marker in glomeruli  
512 (VENKATAREDDY *et al.* 2014).

513

514 **Liver Expression QTL Mapping:** We performed linkage mapping on 12,067 liver  
515 genes and identified additive QTL (File S10), QTL that interact with sex (File S11) and  
516 QTL that interact with diet (File S12). We mapped local and distant eQTL using an  
517 additive linkage model, and two models in which sex or diet interacts with genotype. We  
518 plotted the location of significant QTL versus gene location for each model and found  
519 that the additive and sex-interactive models produced local eQTL (Figure 6A & B) and  
520 the diet-interactive model did not (Figure 6C). At a significance threshold of 0.05, we  
521 found that 8,127 local eQTL out of 9,754 total (83.3%) in the additive model, 332 out of  
522 532 (62.4%) in the sex-interactive model and 23 out of 219 (10.5%) in the diet-  
523 interactive model. We have provided an on-line visualization tool at [http://churchill-](http://churchill-lab.jax.org/qtl/svenson/DO478/)  
524 [lab.jax.org/qtl/svenson/DO478/](http://churchill-lab.jax.org/qtl/svenson/DO478/).

525

526 **XO Females:** XO females have been previously reported in high numbers in DO mice  
527 (CHESLER *et al.* 2016). In order to search for XO females, we plotted the liver expression  
528 of *Xist* as an indicator of X chromosome gene expression versus *Ddx3y* as a marker of  
529 Y chromosome gene expression (Figure 7). As expected, females that were dizygous  
530 for the X chromosome had high *Xist* expression and low *Ddx3y* expression while males  
531 had high *Ddx3y* expression and lower *Xist* expression. There were two females (out of

532 244, 0.82%) that had low *Xist* expression, consistent with hemizyosity on the X  
533 chromosome, and low *Ddx3y* expression and these samples are XO females. In  
534 humans, Turner Syndrome describes females with the XO genotype and is  
535 characterized by short stature, a propensity for ovarian dysfunction and infertility, and  
536 heart defects. The two XO females in our study, one fed chow and the other fed the  
537 HFD, had very different phenotypes and were not outliers for any particular trait. One of  
538 them, however, was especially resistant to weight gain on HFD, gaining only 5 grams of  
539 body weight over the course of the study, and died 4 weeks before the scheduled end of  
540 the study.

541

542

543

## DISCUSSION

544

545 Multi-parent populations are excellent tools for studying the effects of genetic diversity  
546 on phenotypic variation because they offer increased genetic diversity, high minor allele  
547 frequencies and fine recombination block structure. The large number of variants leads  
548 to perturbation of genes throughout the genome and the high minor allele frequency  
549 produces high power to detect the effects of these polymorphisms. The fine  
550 recombination block structure leads to fine mapping resolution to identify loci that  
551 contain a manageable number of candidate genes. These loci may contain genetic  
552 variants that alter either protein structure or transcript levels or both. In fact, many loci in  
553 multi-parent crosses may be caused by more than one genetic variant and  
554 disentangling the signal from these different alleles is a complex process. For the  
555 cholesterol loci on chromosomes 1 and 5, we combined association mapping using

556 imputed SNPs with mediation analysis using liver transcripts and we identified  
557 candidate genes using both missense SNPs and transcript levels. This approach is  
558 broadly applicable in the DO and other multi-parent populations, but requires  
559 transcriptional profiling in a relevant tissue.

560

561 CHOL levels were associated with two loci on chromosomes 1 and 5. Variation at these  
562 loci affected mice of both sexes and on both diets. In contrast, CHOL at eight weeks  
563 had a QTL on chromosome 10 with effects that were modified by diet. The HFD  
564 increased CHOL levels by 35.9% in males and 45.1% in females, indicating that diet  
565 increases CHOL levels in most mice. However, DO mice carrying the NOD allele on  
566 chromosome 10 have higher CHOL levels than mice carrying other alleles at the same  
567 locus. The locus covered several Mb and may contain more than one polymorphism  
568 that affects CHOL levels, independent of diet.

569

570 Association mapping on chromosome 1 produced a set of SNPs with high LOD scores  
571 for which 129S1 and WSB contributed the minor allele. Initially, we expected to find  
572 SNPs with this allele pattern that alter the protein structure or expression levels of some  
573 gene. However, in this case, we believe that two closely located SNPs in *Apoa2*, each  
574 of which is private to either 129S1 or WSB, are influencing CHOL levels. The SNP in  
575 129S1 (rs8258226) has been shown to increase CHOL levels and we hypothesize that  
576 the SNP in WSB (rs229811374), which is 2 residues away from rs8258226, may also  
577 increase CHOL levels. This highlights the complexity of analyses in multi-parent

578 crosses. Had we not known of any candidate genes in this region, we may have been  
579 led to consider other genes that are unrelated to CHOL metabolism.

580

581 Mediation analysis identified several candidate genes on chromosome 1. By its nature,  
582 mediation analysis is a hypothesis generating analysis. All of the genes, *Cfhr1*, *Ctse*  
583 and *F13b* are within 10 Mb of each other. Of these, *Ctse* is the only gene that had been  
584 previously associated with hypercholesterolemia (ZHENG *et al.* 2015). The situation is  
585 similar for the CHOL peak on chromosome 5. *Scarb1* has been associated with  
586 differences in CHOL levels, but *Trafd1* is a new candidate gene that may have effects of  
587 CHOL independent of *Scarb1*. These findings suggest that some strong associations  
588 that appear in MAGIC populations may be due to multiple, tightly linked polymorphisms.  
589 If this is true, more sophisticated, multi-locus approaches to candidate gene selection  
590 will be needed to find causal genes. In this study, we suggest that both association  
591 mapping and mediation analysis with transcript levels improve the reliability of candidate  
592 gene selection because it allows investigators to search for polymorphisms that affect  
593 protein structure or transcript levels.

594

595 When we performed liver eQTL mapping, we found local eQTL for both the additive  
596 model and the sex-interactive model. This suggests that local polymorphisms in  
597 regulatory elements modulate transcript levels constitutively in both sexes and  
598 differentially by sex. However, when we mapped liver transcript levels using a model in  
599 which diet interacts with genotype, we found very few local eQTL. This suggests that

600 the response to diet is less influenced by the interaction of diet with local polymorphisms  
601 affecting transcript levels, we speculate that distant loci are acting through non-  
602 transcriptional mechanisms such as interactions between proteins (CHICK *et al.* 2016).

603

604 Our analysis of this large study using DO mice includes a novel multi-tiered approach  
605 that has identified plausible candidate genes underlying physiological traits, has  
606 extended to considering effects of transcription, and provides compelling evidence for  
607 further investigation of the role of novel candidates in driving metabolic traits. We  
608 present an analysis of the complex interplay of sex and diet and how these factors  
609 influence important inter-individual variation in outcome. We found that diet increases  
610 many traits related to body size and composition. Interestingly, we observed that a high  
611 fat, high sucrose diet increased the variance of liver gene expression, suggesting that  
612 genotype influences the range of responses to diet. We mapped loci for multiple traits  
613 but focused on CHOL to demonstrate the complexity of the underlying genetic loci. We  
614 note that both association mapping and mediation analysis using liver transcript data  
615 help to dissect the causal alleles underlying mapping peaks. Finally, we observe that  
616 changes in liver transcription in response to diet are not primarily altered by local  
617 genetic variants. This suggests that other molecular measurements, such as protein or  
618 metabolite levels may be more useful in determining the effects of diet on organisms.  
619 We have made the phenotype and genotype data fully available to the public and have  
620 released an interactive viewer to allow the reader to explore the liver expression QTL  
621 data.

622

623

## ACKNOWLEDGEMENTS

624 This work was funded by P50GM076468 and R01GM070683 to G.A.C. from the  
625 National Institute of General Medical Sciences.

626

627

## FIGURES

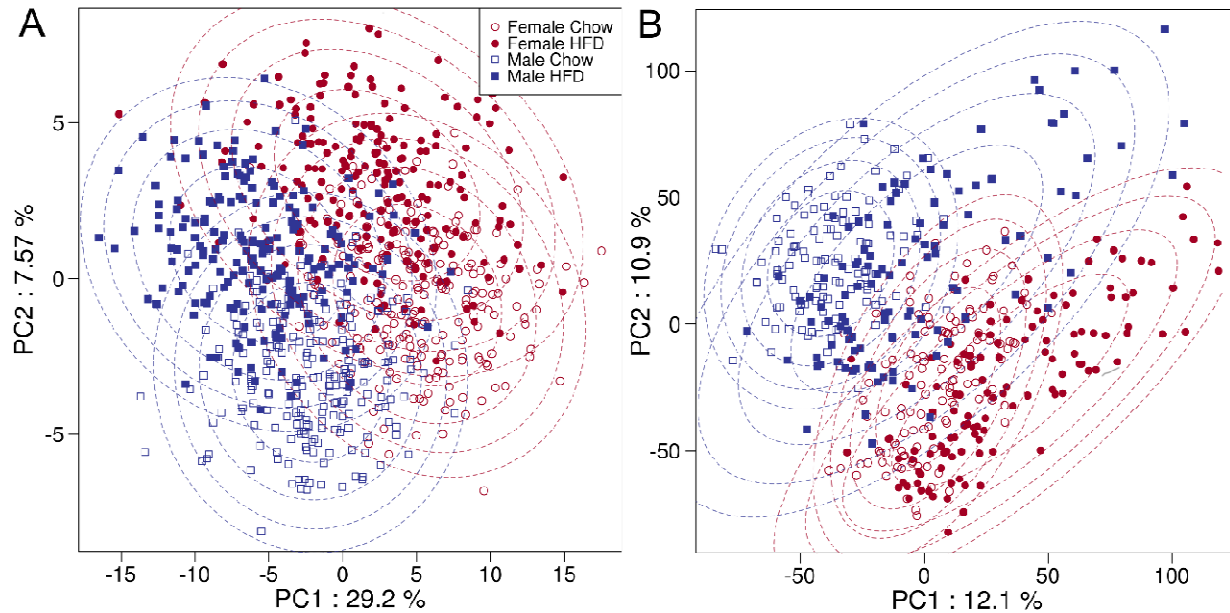

628

629 **Figure1.** Principal component analysis (PCA) of physiological and liver transcription  
630 traits. (A) PCA plot of the first and second principal components of the physiological  
631 traits. Each point represents one mouse. Females are red; males are blue; mice on the  
632 chow diet are shown with open symbols; mice on the HFD with closed symbols. Dashed  
633 lines are ellipses from bivariate Gaussian distributions fit over each of the four sex and  
634 diet groups. (B) PCA plot of the first and second principal components of the liver  
635 transcription traits.

636

637

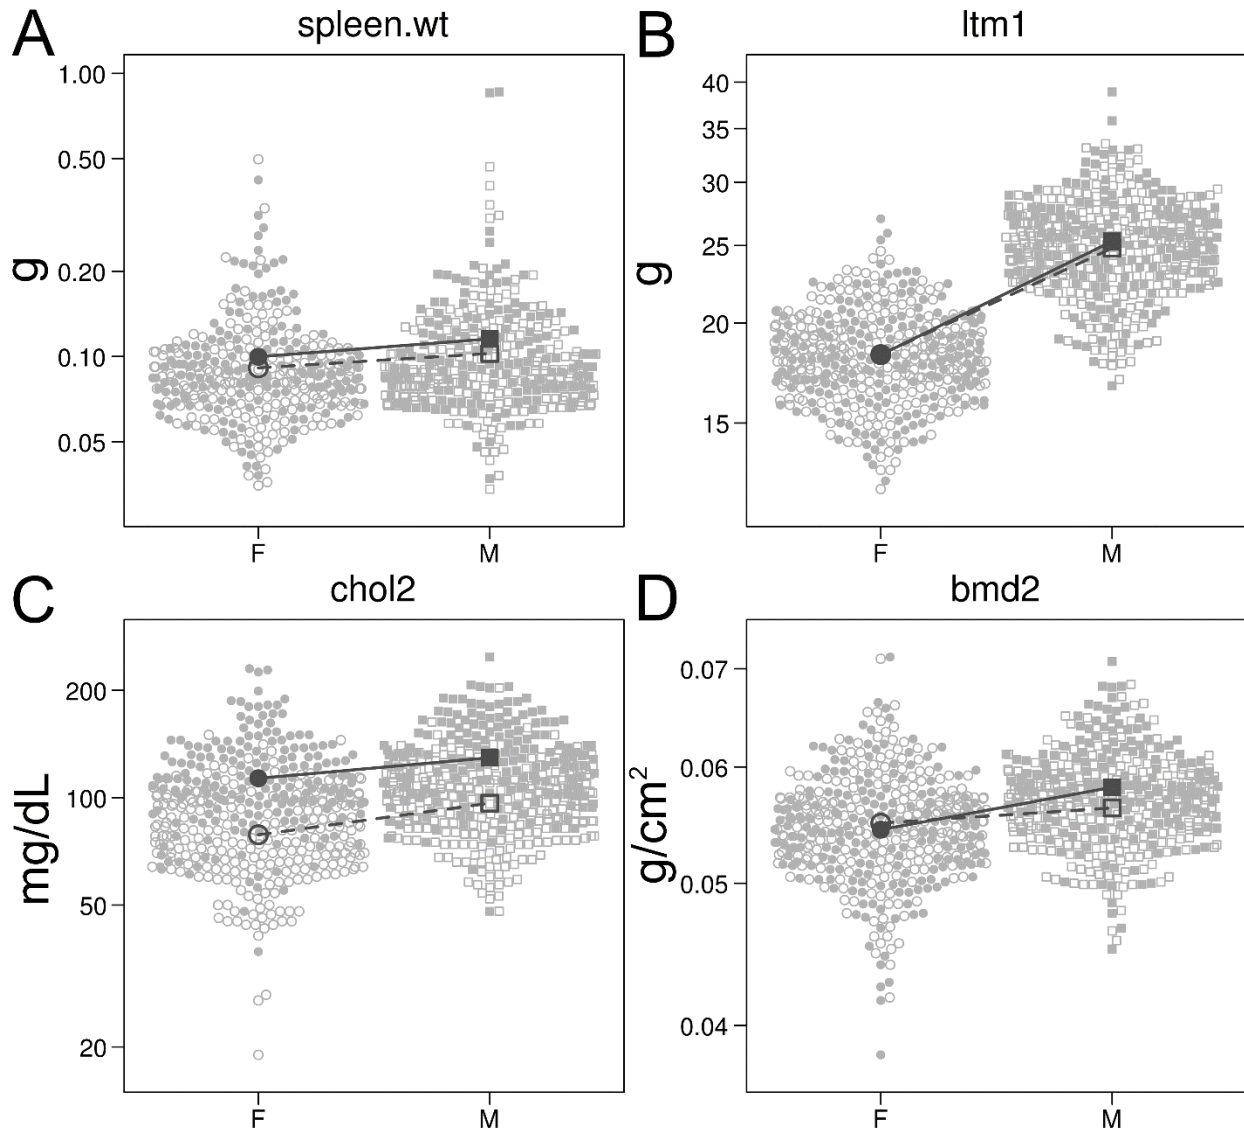

638

639 **Figure 2.** Physiological traits in the DO. Each plots shows female (circles) and male  
640 (squares) mice on chow (open symbols) and HFD (solid symbols). The open symbols  
641 connected by dashed lines show the chow diet group means. The closed symbols  
642 connected by solid lines show the HFD group means. (A) Spleen weight did not vary  
643 between sexes or diet groups. (B) Lean tissue mass at 12 weeks differed by sex and  
644 was not affected by diet. (C) Cholesterol at 19 weeks had both a significant difference



645 between sexes and diets. (D) Bone mineral density at 21 weeks had one of the most  
646 significant sex by diet interactions, showing a greater response in males to HFD

647

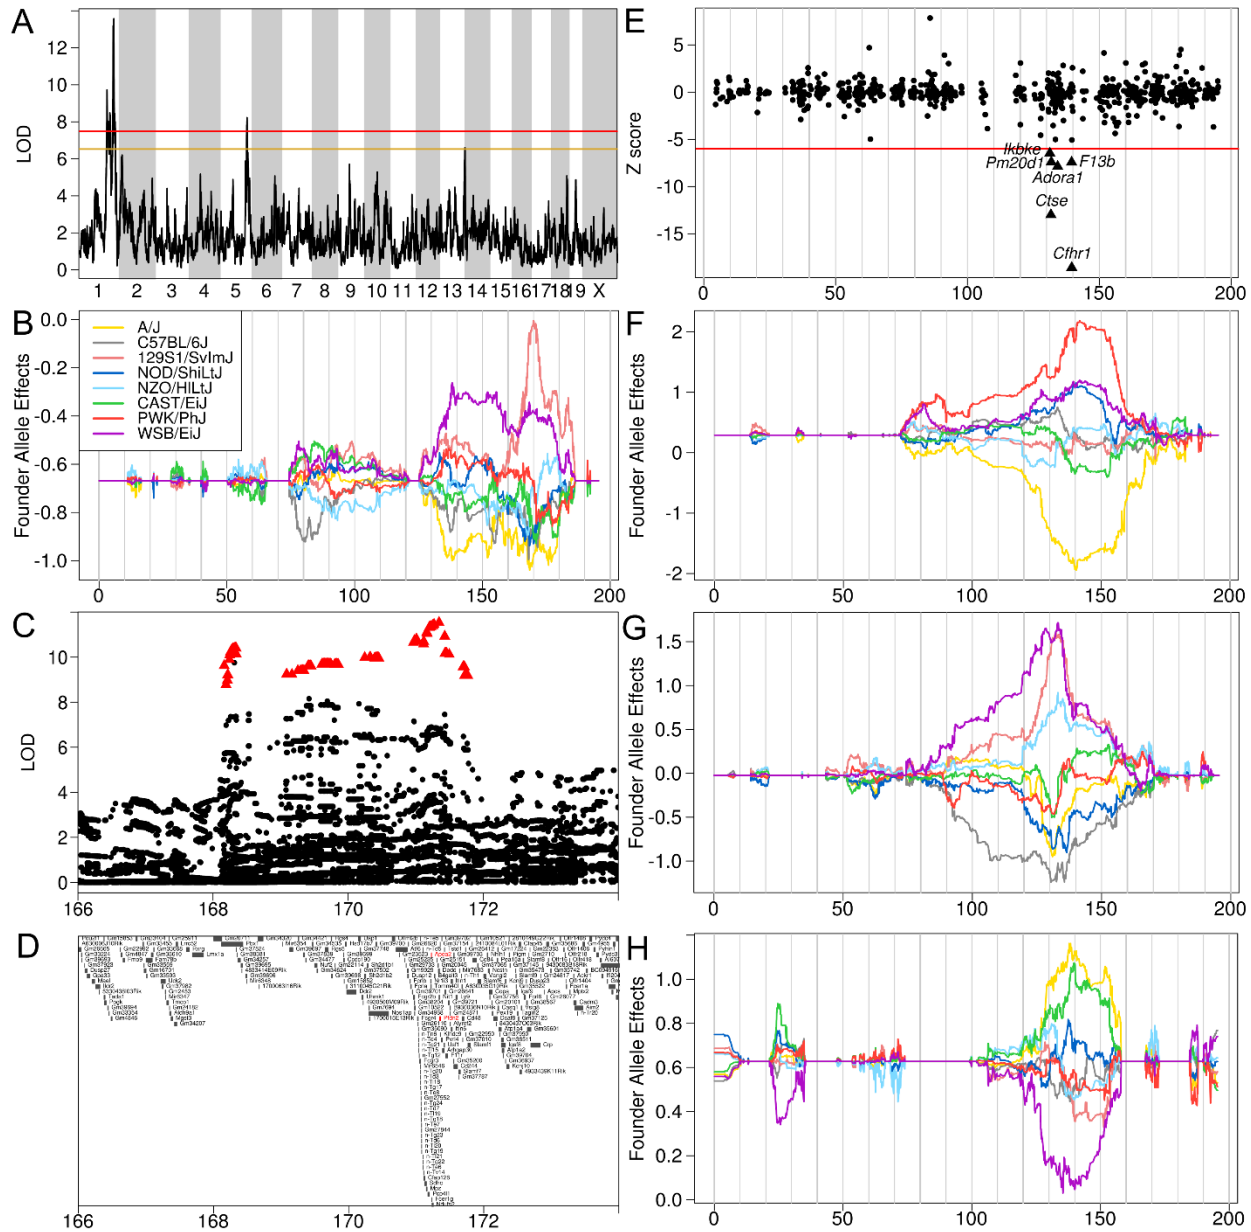

648  
 649 **Figure 3.** Analysis of cholesterol QTL on chromosome 1. (A) Genome scan of  
 650 cholesterol at 19 weeks shows peaks on chromosomes 1 and 5. The horizontal axis  
 651 shows the mouse genome and the vertical axis shows the LOD score. Red and yellow  
 652 lines are the  $p = 0.05$  and  $0.2$  significance levels, respectively. The horizontal axis in  
 653 panels B through H shows the location in Mb on chromosome 1. (B) DO founder allele  
 654 effects on chromosome 1 for cholesterol at 19 weeks (CHOL2). Each colored line

655 represents the estimated effect of one of the founder alleles along the chromosome. (C)  
656 Association mapping near the peak on chromosome 1 shows that the SNPs for which  
657 129S1 and WSB contribute the minor allele have the highest LOD scores (red  
658 triangles). (D) Genes in the region one chromosome 1 shown in panel C. *Apoa2* and  
659 *Pfdn2* are colored in red and are mentioned in the text. (E) Mediation analysis shows  
660 that six genes reduce the LOD score by more than 6 standard deviations. The vertical  
661 axis shows the Z-score (scaled LOD across all genes). Each point represent the Z-  
662 score (standardized LOD score reduction) for one gene in the mediation analysis. The  
663 genes are located along the horizontal axis. The red line shows  $Z = -6$ . DO founder  
664 allele effects for liver expression of (F) *Cfhr1*, (G) *Ctse* and (H) *F13b* on chromosome 1.

665

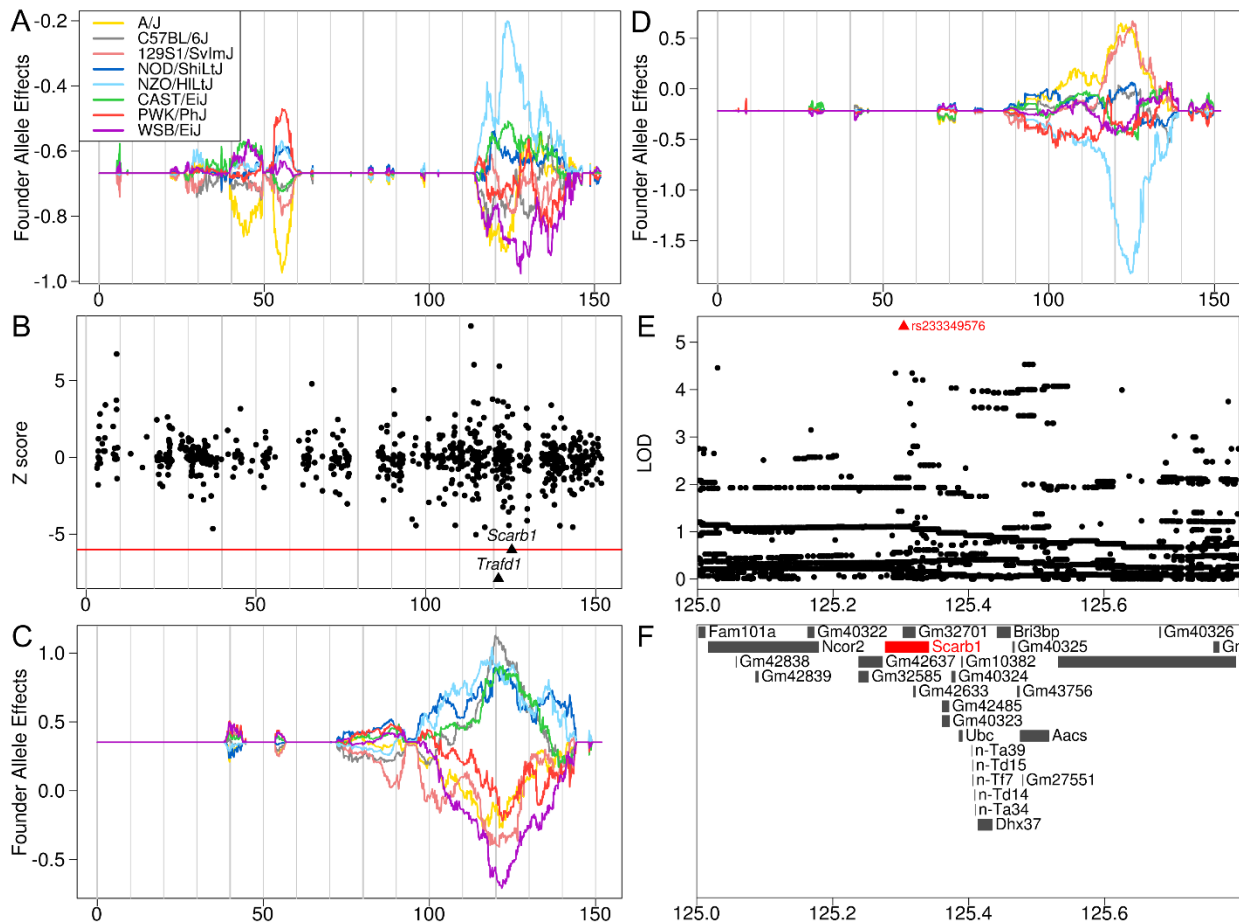

666

667 **Figure 4.** Cholesterol QTL at 19 weeks (CHOL2) on chromosome 5 suggest *Trafd1* and

668 *Scarb1* as a candidate gene for circulating cholesterol levels. (A) Founder allele effects

669 for CHOL2 show that the NZO allele at 123.7 Mb is associated with higher cholesterol

670 levels. Each colored line represents the estimated effects of one founder allele. (B)

671 Mediation analysis of the CHOL QTL on Chr 5 using liver transcripts as mediators. Each

672 dot represents the Z-score of the LOD decrease after including one gene in the

673 mapping model. The red line is the  $Z = -6$  threshold. (C) Founder allele effects for liver

674 *Trafd1* transcript levels have a similar pattern of allele effects as CHOL2. (D) Founder

675 allele effects for liver *Scarb1* transcript levels show that DO mice with the NZO allele on

676 chromosome 5 at 123.7 Mb have lower levels of *Scarb1*. (E & F) Association mapping in

677 the interval near the QTL identifies a single SNP (rs233349576) that introduces a stop  
678 codon into a *Scarb1* transcript.

679

680

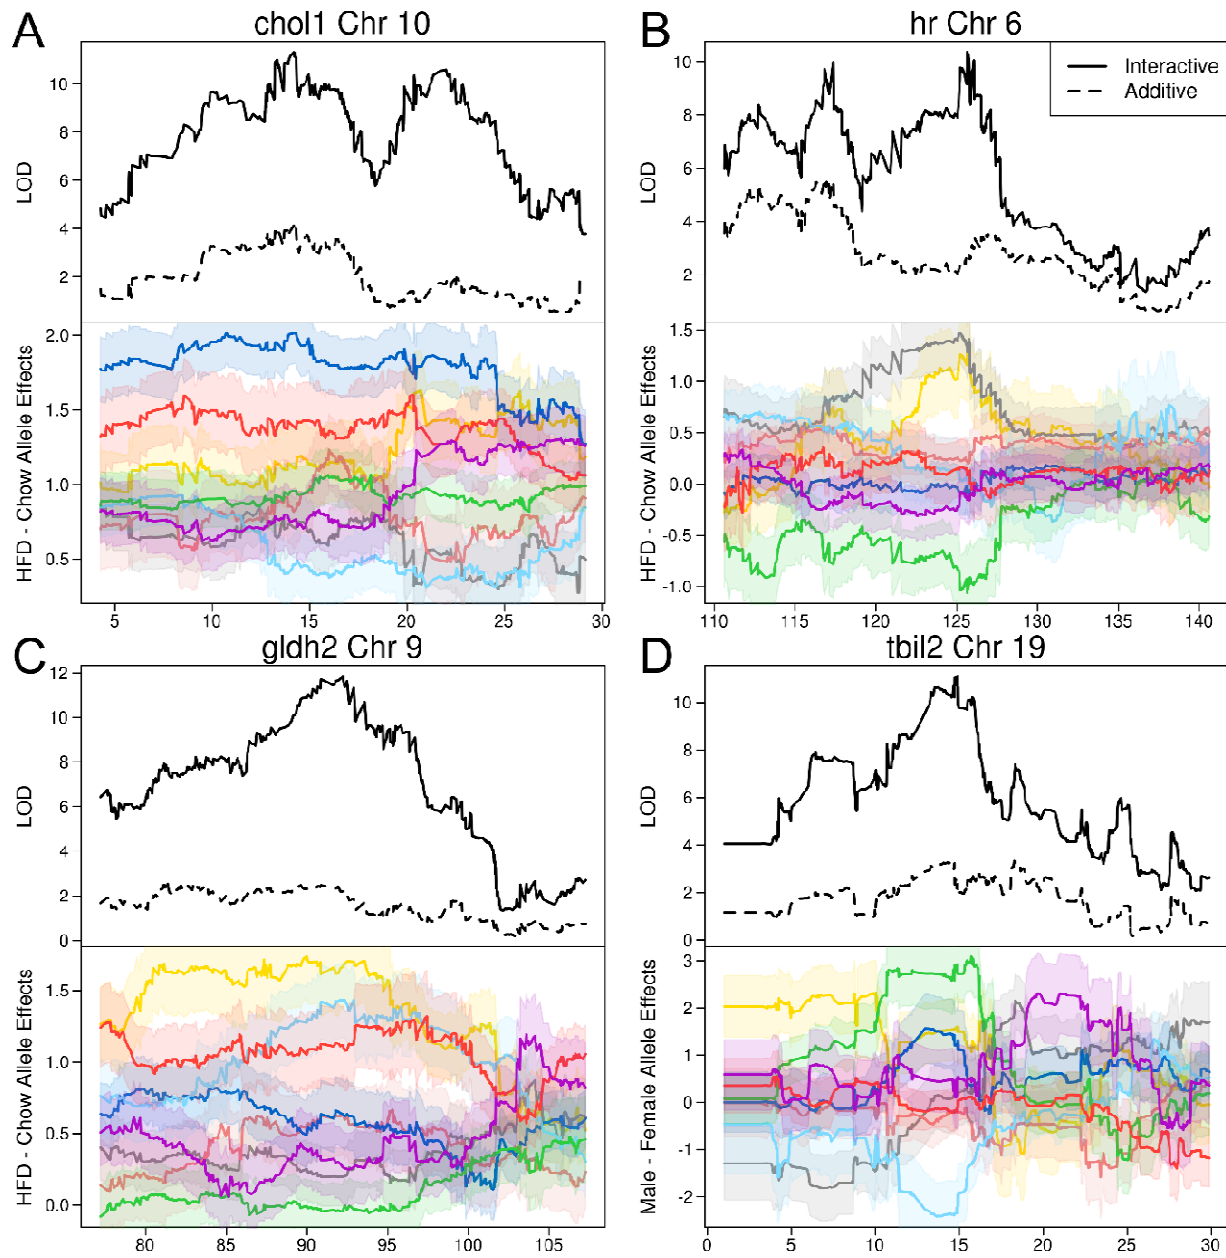

681

682 **Figure 5.** Sex- and diet-interactive QTL plots. Each plot has two panels. The top panel

683 shows the additive LOD (dashed line) and the interactive LOD (solid line). The lower

684 panel shows the difference between the interactive and additive founder allele effects,

685 with standard errors in light shading. Each founder is represented by a separate color:

686 A/J yellow, C57BL/6J grey, 129S1/SvImJ pink, NOD/ShiLtJ cyan, NZO/HILtJ blue,

687 CAST/EiJ green, PWK/PhJ red and WSB/EiJ purple. (A) Cholesterol at eight weeks had

688 a diet-interactive QTL on chromosome 10. (B) Heart rate had a diet-interactive QTL on  
689 chromosome 6. (C) Glutamate dehydrogenase at 19 weeks had a diet-interactive QTL  
690 on chromosome 9. (D) Bilirubin at 19 weeks had a sex-interactive QTL on chromosome  
691 10.

692

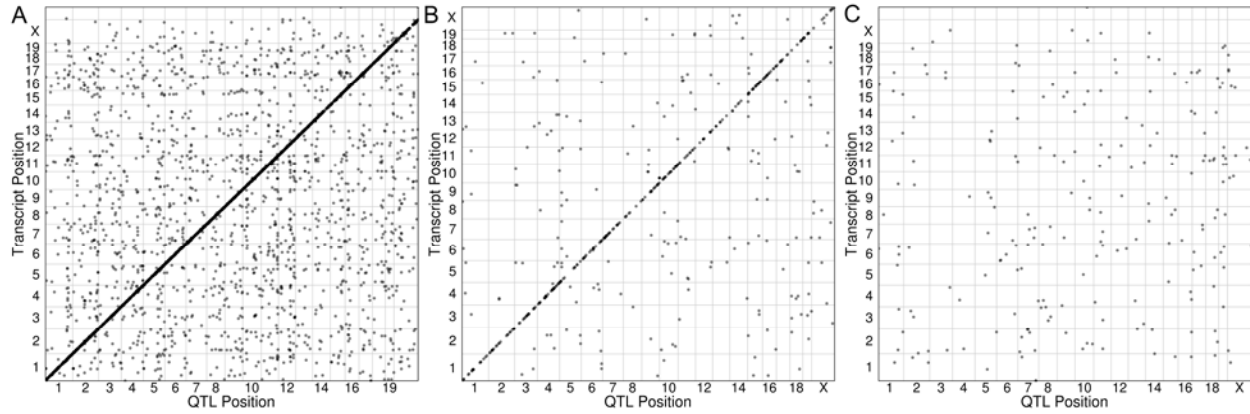

693

694 **Figure 6.** Liver expression QTL maps generated from an (A) additive model (File S10),

695 (B) a model in which sex interacts with genotype (File S11), or (C) a model in which diet

696 interacts with genotype (File S12). Each dot represents the location of a QTL peak for

697 one gene above the  $p = 0.05$  threshold. Each panel plots the QTL position on the

698 horizontal axis and the transcript position on the vertical axis.

699



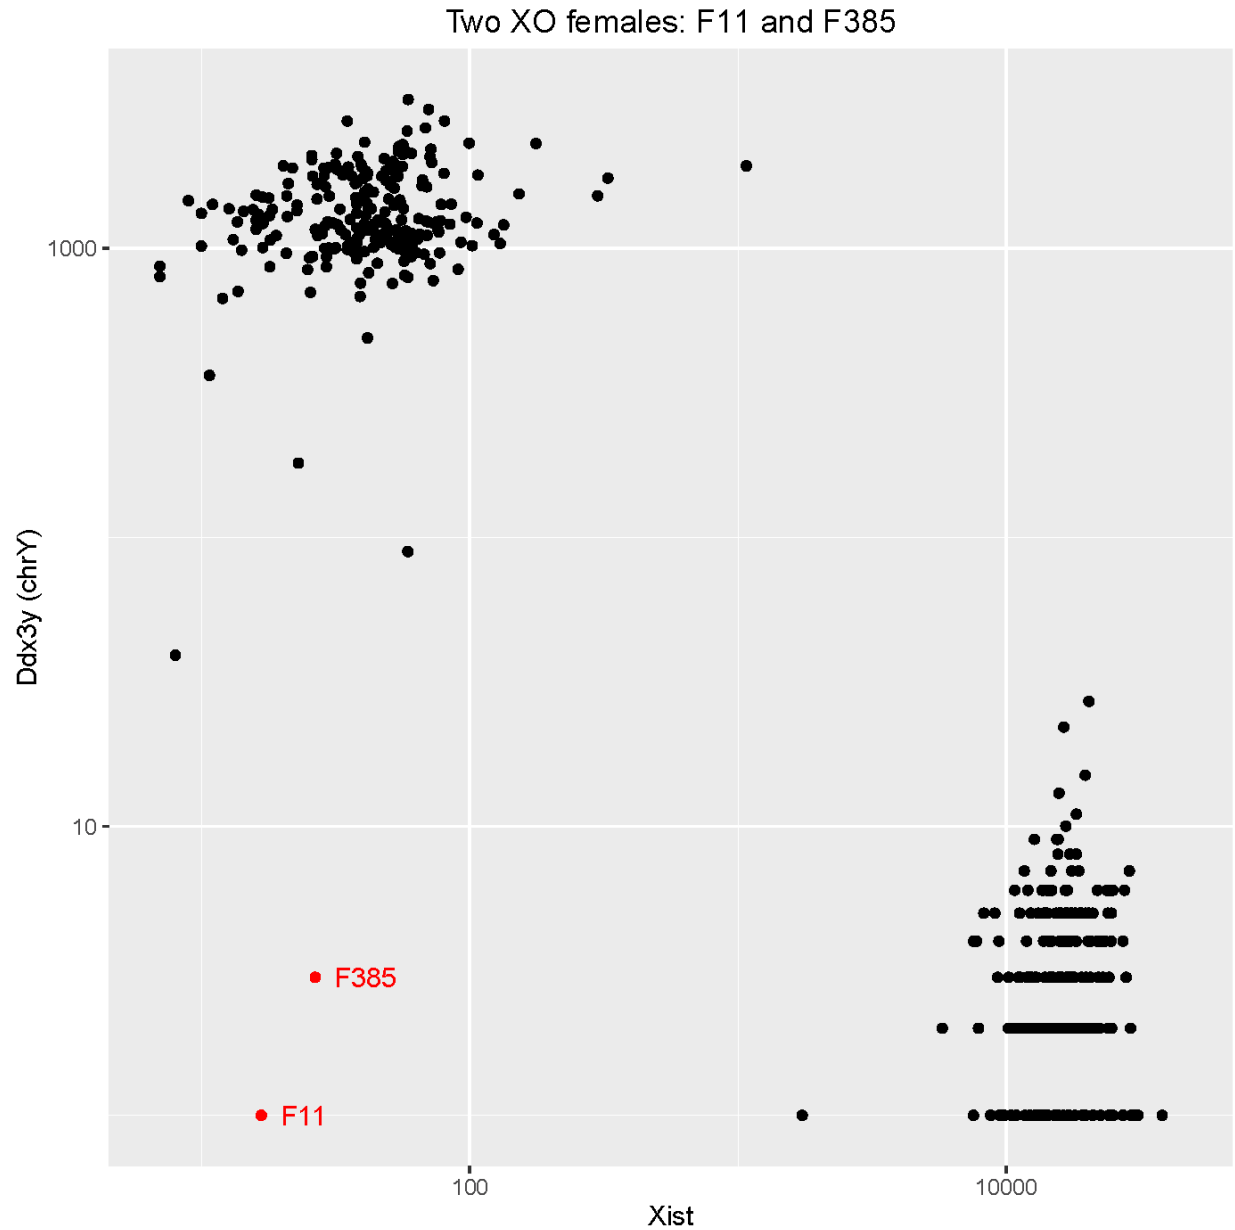

700

701 **Figure 7.** XO females in the DO population. For each mouse, we plotted the

702 untransformed expression of *Xist* versus *Ddx3y* and found two XO females (in red).

703 Females have high *Xist* expression and low *Ddx3y* expression. Males have low *Xist*

704 expression and high *Ddx3y* expression.

705

706  
707  
708  
709  
710  
711  
712  
713  
714  
715  
716  
717  
718  
719  
720  
721  
722  
723  
724  
725  
726  
727

## REFERENCES

- ASHBURNER, M., C. A. BALL, J. A. BLAKE, D. BOTSTEIN, H. BUTLER *et al.*, 2000 Gene ontology: tool for the unification of biology. The Gene Ontology Consortium. *Nat Genet* **25**: 25-29.
- BARRY, W. T., A. B. NOBEL and F. A. WRIGHT, 2005 Significance analysis of functional categories in gene expression studies: a structured permutation approach. *Bioinformatics* **21**: 1943-1949.
- BENJAMINI, Y., and Y. HOCHBERG, 1995 Controlling the False Discovery Rate - a Practical and Powerful Approach to Multiple Testing. *Journal of the Royal Statistical Society Series B-Methodological* **57**: 289-300.
- BUDOFF, M. J., L. J. SHAW, S. T. LIU, S. R. WEINSTEIN, T. P. MOSLER *et al.*, 2007 Long-term prognosis associated with coronary calcification: observations from a registry of 25,253 patients. *J Am Coll Cardiol* **49**: 1860-1870.
- CHESLER, E. J., D. M. GATTI, A. P. MORGAN, M. STROBEL, L. TREPANIER *et al.*, 2016 Diversity Outbred Mice at 21: Maintaining Allelic Variation in the Face of Selection. *G3 (Bethesda)* **6**: 3893-3902.
- CHICK, J. M., S. C. MUNGER, P. SIMECEK, E. L. HUTTLIN, K. CHOI *et al.*, 2016 Defining the consequences of genetic variation on a proteome-wide scale. *Nature* **534**: 500-505.
- CHURCHILL, G. A., D. C. AIREY, H. ALLAYEE, J. M. ANGEL, A. D. ATTIE *et al.*, 2004 The Collaborative Cross, a community resource for the genetic analysis of complex traits. *Nature genetics* **36**: 1133-1137.
- GALLO, L., M. C. FANIELLO, G. CANINO, C. TRIPOLINO, A. GNASSO *et al.*, 2016 Serum Calcium Increase Correlates With Worsening of Lipid Profile: An Observational Study on a Large Cohort From South Italy. *Medicine (Baltimore)* **95**: e2774.
- GATTI, D. M., K. L. SVENSON, A. SHABALIN, L. Y. WU, W. VALDAR *et al.*, 2014 Quantitative trait locus mapping methods for diversity outbred mice. *G3 (Bethesda)* **4**: 1623-1633.

- 728 GILKES, D. M., S. BAJPAI, P. CHATURVEDI, D. WIRTZ and G. L. SEMENZA, 2013 Hypoxia-inducible factor 1 (HIF-1)  
729 promotes extracellular matrix remodeling under hypoxic conditions by inducing P4HA1, P4HA2,  
730 and PLOD2 expression in fibroblasts. *J Biol Chem* **288**: 10819-10829.
- 731 GLASSCOCK, E., J. W. YOO, T. T. CHEN, T. L. KLASSEN and J. L. NOEBELS, 2010 Kv1.1 potassium channel  
732 deficiency reveals brain-driven cardiac dysfunction as a candidate mechanism for sudden  
733 unexplained death in epilepsy. *J Neurosci* **30**: 5167-5175.
- 734 GRIFFIN, C., N. LANZETTA, L. ETER and K. SINGER, 2016 Sexually dimorphic myeloid inflammatory and  
735 metabolic responses to diet-induced obesity. *Am J Physiol Regul Integr Comp Physiol* **311**: R211-  
736 216.
- 737 GUO, D., L. YOUNG, C. PATEL, Z. JIAO, Y. WU *et al.*, 2008 Calcium-activated chloride current contributes to  
738 action potential alternations in left ventricular hypertrophy rabbit. *Am J Physiol Heart Circ*  
739 *Physiol* **295**: H97-H104.
- 740 HARIRI, N., and L. THIBAUT, 2010 High-fat diet-induced obesity in animal models. *Nutr Res Rev* **23**: 270-  
741 299.
- 742 HARTZELL, H. C., K. YU, Q. XIAO, L. T. CHIEN and Z. QU, 2009 Anoctamin/TMEM16 family members are Ca<sup>2+</sup>-  
743 activated Cl<sup>-</sup> channels. *J Physiol* **587**: 2127-2139.
- 744 IANCU, O. D., P. DARAKJIAN, N. A. WALTER, B. MALMANGER, D. OBERBECK *et al.*, 2010 Genetic diversity and  
745 striatal gene networks: focus on the heterogeneous stock-collaborative cross (HS-CC) mouse.  
746 *BMC genomics* **11**: 585.
- 747 KADOWAKI, T., M. A. KIDO, J. HATAKEYAMA, K. OKAMOTO, T. TSUKUBA *et al.*, 2014 Defective adipose tissue  
748 development associated with hepatomegaly in cathepsin E-deficient mice fed a high-fat diet.  
749 *Biochem Biophys Res Commun* **446**: 212-217.
- 750 KANTER, R., and B. CABALLERO, 2012 Global gender disparities in obesity: a review. *Adv Nutr* **3**: 491-498.

- 751 KEANE, T. M., L. GOODSTADT, P. DANECEK, M. A. WHITE, K. WONG *et al.*, 2011 Mouse genomic variation and  
752 its effect on phenotypes and gene regulation. *Nature* **477**: 289-294.
- 753 KVALOY, K., B. KULLE, P. ROMUNDSTAD and T. L. HOLMEN, 2013 Sex-specific effects of weight-affecting gene  
754 variants in a life course perspective--The HUNT Study, Norway. *Int J Obes (Lond)* **37**: 1221-1229.
- 755 LIN, C., M. L. THEODORIDES, A. H. MCDANIEL, M. G. TORDOFF, Q. ZHANG *et al.*, 2013 QTL analysis of dietary  
756 obesity in C57BL/6byjX 129P3/J F2 mice: diet- and sex-dependent effects. *PLoS One* **8**: e68776.
- 757 MOHR, M., M. KLEMP, B. RATHKOLB, M. H. DE ANGELIS, E. WOLF *et al.*, 2004 Hypercholesterolemia in ENU-  
758 induced mouse mutants. *J Lipid Res* **45**: 2132-2137.
- 759 MORGAN, A. P., C. P. FU, C. Y. KAO, C. E. WELSH, J. P. DIDION *et al.*, 2016 The Mouse Universal Genotyping  
760 Array: From Substrains to Subspecies. *G3 (Bethesda)* **6**: 263-279.
- 761 MOTT, R., C. J. TALBOT, M. G. TURRI, A. C. COLLINS and J. FLINT, 2000 A method for fine mapping quantitative  
762 trait loci in outbred animal stocks. *Proc Natl Acad Sci U S A* **97**: 12649-12654.
- 763 NODA, T., H. YAMAMOTO, I. TAKEMASA, D. YAMADA, M. UEMURA *et al.*, 2012 PLOD2 induced under hypoxia is  
764 a novel prognostic factor for hepatocellular carcinoma after curative resection. *Liver Int* **32**: 110-  
765 118.
- 766 PITMAN, W. A., R. KORSTANJE, G. A. CHURCHILL, E. NICODEME, J. J. ALBERS *et al.*, 2002 Quantitative trait locus  
767 mapping of genes that regulate HDL cholesterol in SM/J and NZB/B1NJ inbred mice. *Physiol*  
768 *Genomics* **9**: 93-102.
- 769 POWER, M. L., and J. SCHULKIN, 2008 Sex differences in fat storage, fat metabolism, and the health risks  
770 from obesity: possible evolutionary origins. *Br J Nutr* **99**: 931-940.
- 771 PY, B., S. BASMACIOGULLARI, J. BOUCHET, M. ZARKA, I. C. MOURA *et al.*, 2009 The phospholipid scramblases 1  
772 and 4 are cellular receptors for the secretory leukocyte protease inhibitor and interact with CD4  
773 at the plasma membrane. *PLoS One* **4**: e5006.

- 774 RAKSHIT, S., A. RAKSHIT and J. V. PATIL, 2012 Multiparent intercross populations in analysis of quantitative  
775 traits. *J Genet* **91**: 111-117.
- 776 RAT GENOME, S., C. MAPPING, A. BAUD, R. HERMSEN, V. GURYEV *et al.*, 2013 Combined sequence-based and  
777 genetic mapping analysis of complex traits in outbred rats. *Nat Genet* **45**: 767-775.
- 778 SALDANA-ALVAREZ, Y., M. G. SALAS-MARTINEZ, H. GARCIA-ORTIZ, A. LUCKIE-DUQUE, G. GARCIA-CARDENAS *et al.*,  
779 2016 Gender-Dependent Association of FTO Polymorphisms with Body Mass Index in Mexicans.  
780 *PLoS One* **11**: e0145984.
- 781 SONG, Y. B., Y. R. AN, S. J. KIM, H. W. PARK, J. W. JUNG *et al.*, 2012 Lipid metabolic effect of Korean red  
782 ginseng extract in mice fed on a high-fat diet. *J Sci Food Agric* **92**: 388-396.
- 783 STACKLIES, W., H. REDESTIG, M. SCHOLZ, D. WALTHER and J. SELBIG, 2007 *pcaMethods*--a bioconductor  
784 package providing PCA methods for incomplete data. *Bioinformatics* **23**: 1164-1167.
- 785 STOEHR, J. P., J. E. BYERS, S. M. CLEE, H. LAN, I. V. BORONENKOV *et al.*, 2004 Identification of major  
786 quantitative trait loci controlling body weight variation in *ob/ob* mice. *Diabetes* **53**: 245-249.
- 787 STYLIANOU, I. M., K. L. SVENSON, S. K. VANORMAN, Y. LANGLE, J. S. MILLAR *et al.*, 2009 Novel ENU-induced  
788 point mutation in scavenger receptor class B, member 1, results in liver specific loss of SCARB1  
789 protein. *PLoS One* **4**: e6521.
- 790 SU, Z., R. KORSTANJE, S. W. TSAIH and B. PAIGEN, 2008 Candidate genes for obesity revealed from a  
791 C57BL/6J x 129S1/SvImJ intercross. *Int J Obes (Lond)* **32**: 1180-1189.
- 792 SUHRE, K., and C. GIEGER, 2012 Genetic variation in metabolic phenotypes: study designs and applications.  
793 *Nat Rev Genet* **13**: 759-769.
- 794 SVENSON, K. L., D. M. GATTI, W. VALDAR, C. E. WELSH, R. CHENG *et al.*, 2012 High-resolution genetic mapping  
795 using the Mouse Diversity outbred population. *Genetics* **190**: 437-447.
- 796 THREADGILL, D. W., and G. A. CHURCHILL, 2012 Ten years of the collaborative cross. *G3* **2**: 153-156.

797 VALDAR, W., L. C. SOLBERG, D. GAUGUIER, S. BURNETT, P. KLENERMAN *et al.*, 2006 Genome-wide genetic  
798 association of complex traits in heterogeneous stock mice. *Nature genetics* **38**: 879-887.

799 VAN DER SLOT, A. J., A. M. ZUURMOND, A. F. BARDOEL, C. WIJMENGA, H. E. PRUIJS *et al.*, 2003 Identification of  
800 PLOD2 as telopeptide lysyl hydroxylase, an important enzyme in fibrosis. *J Biol Chem* **278**:  
801 40967-40972.

802 VENKATAREDDY, M., S. WANG, Y. YANG, S. PATEL, L. WICKMAN *et al.*, 2014 Estimating podocyte number and  
803 density using a single histologic section. *J Am Soc Nephrol* **25**: 1118-1129.

804 WANG, H., L. H. STORLIEN and X. F. HUANG, 2002 Effects of dietary fat types on body fatness, leptin, and  
805 ARC leptin receptor, NPY, and AgRP mRNA expression. *Am J Physiol Endocrinol Metab* **282**:  
806 E1352-1359.

807 WANG, X., R. KORSTANJE, D. HIGGINS and B. PAIGEN, 2004 Haplotype analysis in multiple crosses to identify a  
808 QTL gene. *Genome Res* **14**: 1767-1772.

809 WHEAT, J. C., D. S. KRAUSE, T. H. SHIN, X. CHEN, J. WANG *et al.*, 2014 The corepressor Tle4 is a novel  
810 regulator of murine hematopoiesis and bone development. *PLoS One* **9**: e105557.

811 YALCIN, B., J. FLINT and R. MOTT, 2005 Using progenitor strain information to identify quantitative trait  
812 nucleotides in outbred mice. *Genetics* **171**: 673-681.

813 YATES, A., W. AKANNI, M. R. AMODE, D. BARRELL, K. BILLIS *et al.*, 2016 Ensembl 2016. *Nucleic Acids Res* **44**:  
814 D710-716.

815 ZHENG, W., N. MAST, A. SAADANE and I. A. PIKULEVA, 2015 Pathways of cholesterol homeostasis in mouse  
816 retina responsive to dietary and pharmacologic treatments. *J Lipid Res* **56**: 81-97.

817

818
